# Supplementary figures and images for: Prehospital triage of patients with acute cardiac complaints: study protocol of HART-c, a multicentre prospective study
Source: PubMed Central journal article supplement — BMJ Open. 2021 Feb 12;11(2):e041553. doi: 10.1136/bmjopen-2020-041553 (PMC7883865; doi:10.1136/bmjopen-2020-041553), 2021-02-12

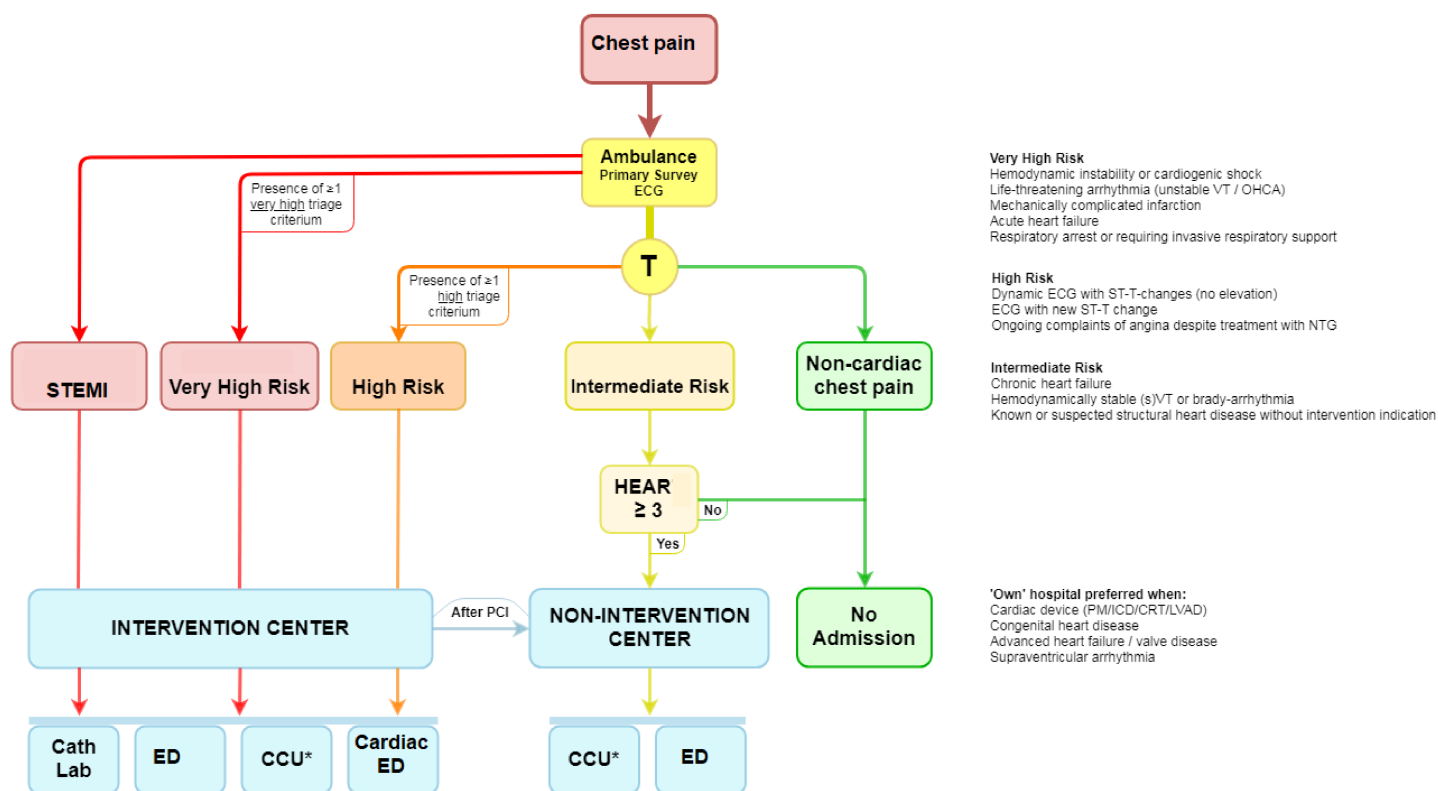

Supplement: bmjopen-2020-041553supp001.pdf [file bmjopen-2020-041553supp001.pdf]

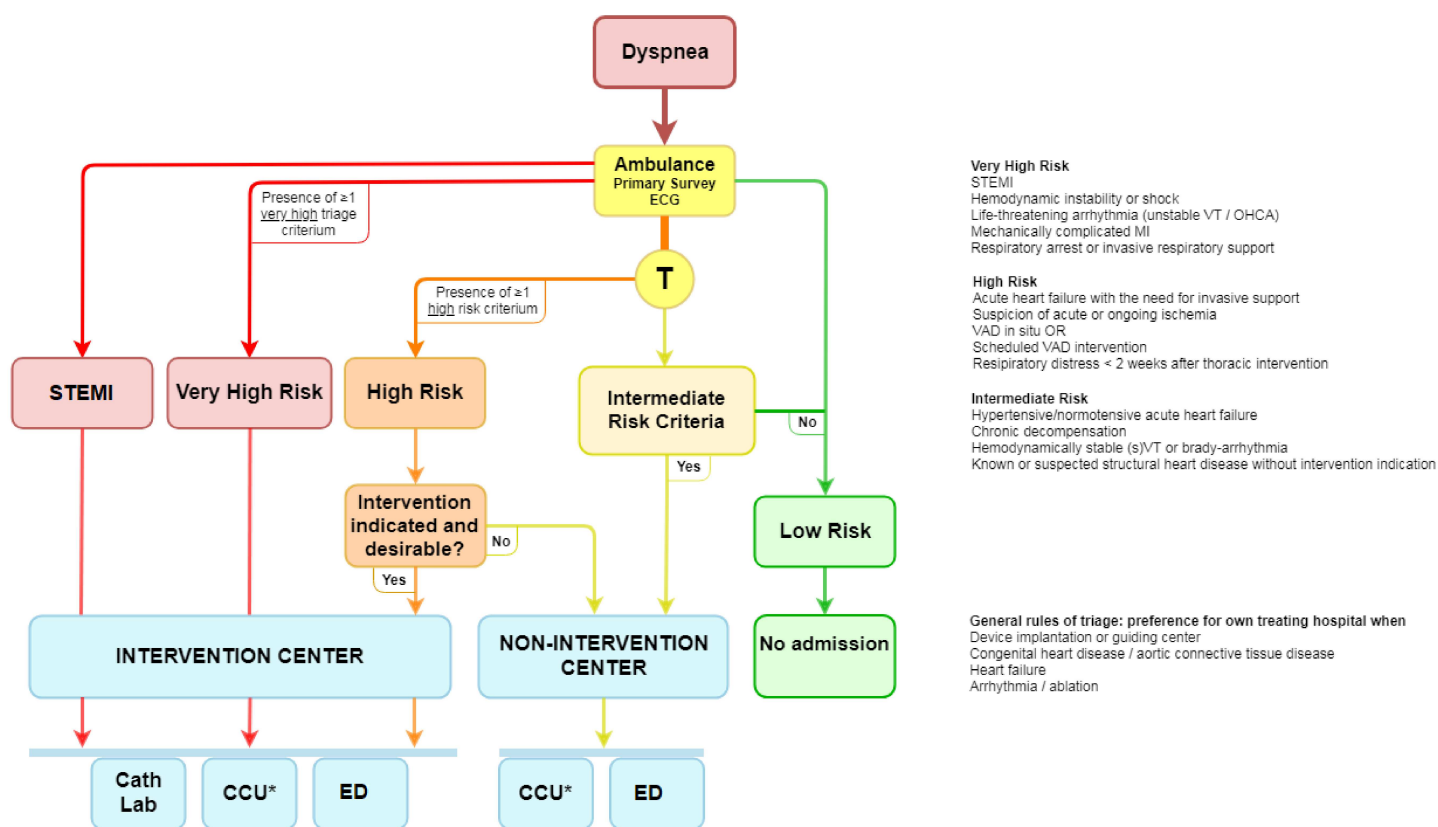

Supplement: bmjopen-2020-041553supp002.pdf [file bmjopen-2020-041553supp002.pdf]

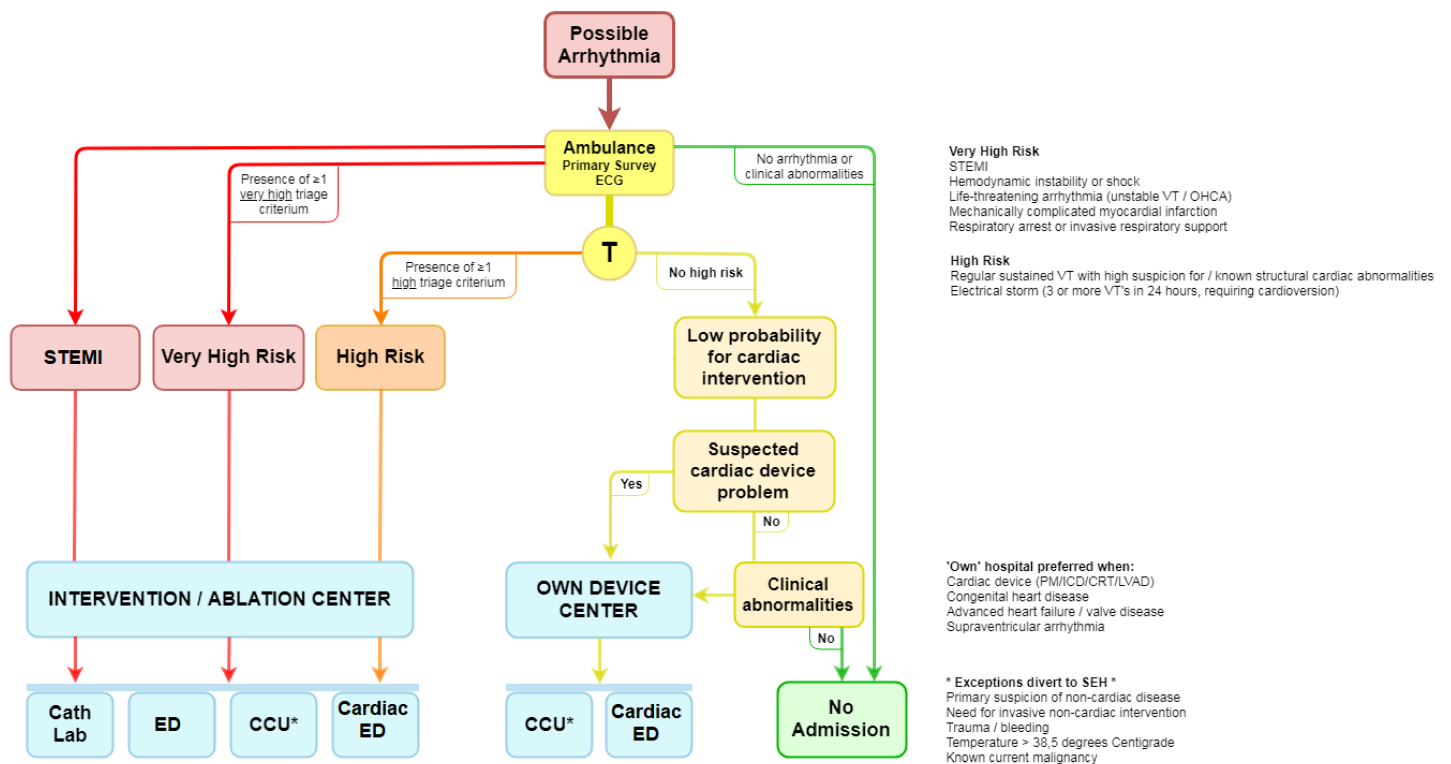

Supplement: bmjopen-2020-041553supp003.pdf [file bmjopen-2020-041553supp003.pdf]
